# Supplementary material
Source: PubMed Central journal article supplement (PMC1382327)

Preimmune  
 $\alpha$ -Exo

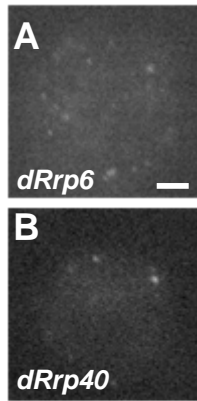

Supplement: mbc_E05-08-0805_1.pdf [file mbc_E05-08-0805_1.pdf]

**A**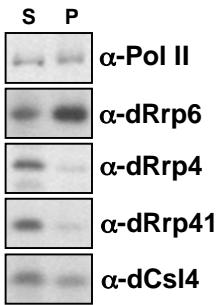**B**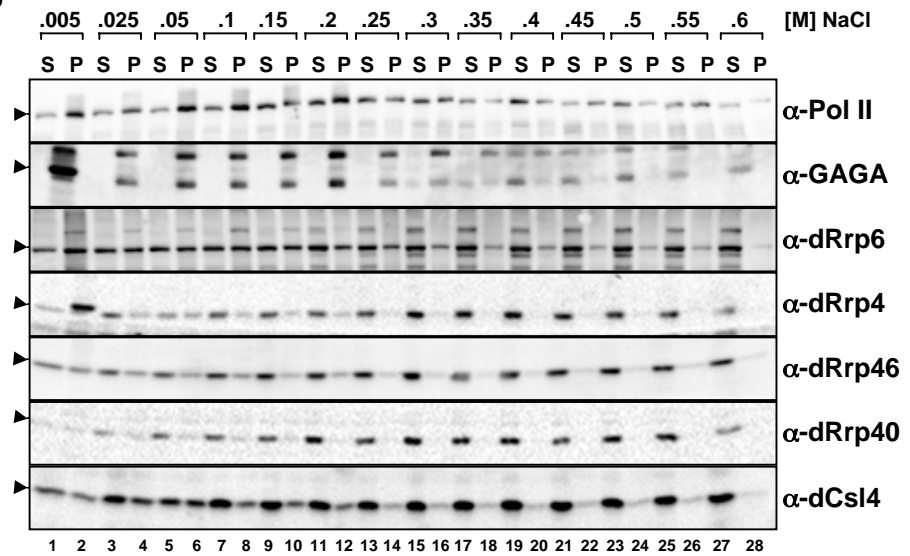

Supplement: mbc_E05-08-0805_2.pdf [file mbc_E05-08-0805_2.pdf]

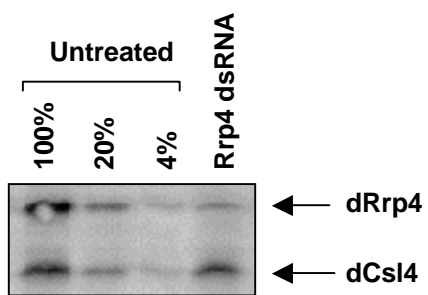

Supplement: mbc_E05-08-0805_3.pdf [file mbc_E05-08-0805_3.pdf]
